# Supplementary material
Source: PubMed Central journal article supplement (PMC4721947)
Supplement: NIHMS736684-supplement-FigS1.pdf [file NIHMS736684-supplement-FigS1.pdf]

**A**

+ MO11

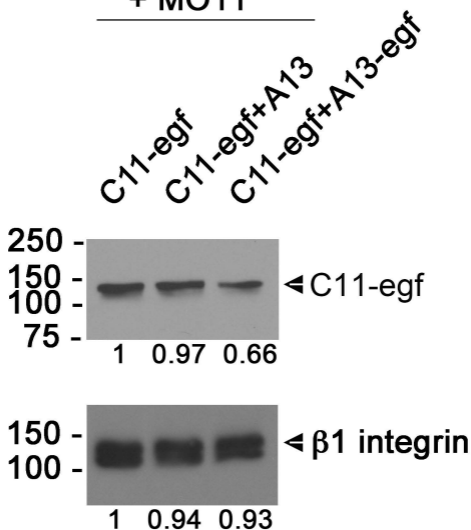**B**

Sup from Hek293T cells

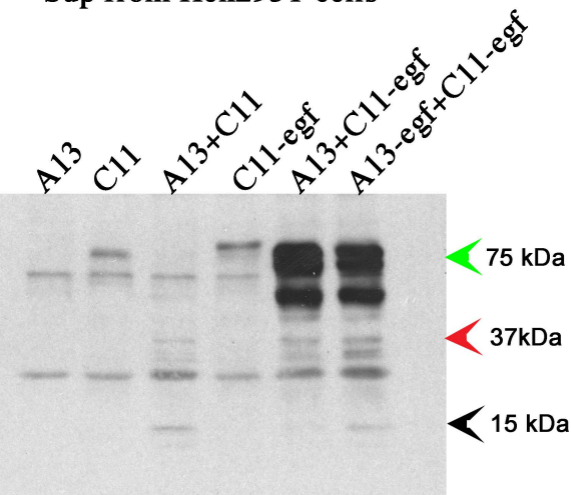

Supplemental figure:

**A) A13-egf decreases the level of C11-egf *in vivo*.**

Embryos were injected at the one cell stage with the Morpholino to C11 with mRNA encoding C11-egf alone or with ADAM13 or ADAM13-egf. Proteins were extracted, and glycoproteins purified on Concanavalin-A-agarose and blotted for cadherin-11 (mAb-1B4) and integrin  $\beta 1$  (mAb-8C8). The relative amount of  $\beta 1$ -integrin was measured (below blot) and used to normalize the relative amount of C11-egf (below blot, normalized values). ADAM13-egf reduces the amount of C11-egf by 34% while ADAM13 reduces by 3%, suggesting that *in vivo* only ADAM13-egf can cleave cadherin-11-egf.

**B) Processing of Cadherin-11 in Hek293T cells.**

Hek293T cells were transfected with the various constructs (top of the gel). Cells were switched to media containing 2% serum after 24 hours and grown for an additional 8 hours. The supernatant were collected spun to remove cells and debris and protease/phosphatase, EDTA and tritonX100 (0.1% final) was added. Glycoproteins were purified on Concanavalin-A-agarose and blotted for the extracellular domain of cadherin-11 (mAb 4F12). The green arrowhead points to a fragment independent of ADAM13 at 75 kDa. The expected size for EC1-3 is at 37 kDa and is found when ADAM13 is co-transfected with cadherin-11 (lane 3). In addition a smaller fragment of 15 kDa is also observed (black arrowhead). The 37 and 15 kDa fragments are observed when cadherin-11-egf is co-transfected with ADAM13-egf and to a lesser extent with ADAM13 suggesting that ADAM13-egf can cleave cadherin-11-egf in Hek293T cells but that additional proteases can cleave both form of cadherin-11 making this assay difficult to interpret.
